# Supplementary material for: Amphiphilic Chitosan Porous Membranes as Potential Therapeutic Systems with Analgesic Effect for Burn Care
Source: MDPI journal article supplement (doi:10.3390/membranes12100973), 2022-10-05
Supplement: s1 [file s1]

## Supplementary materials

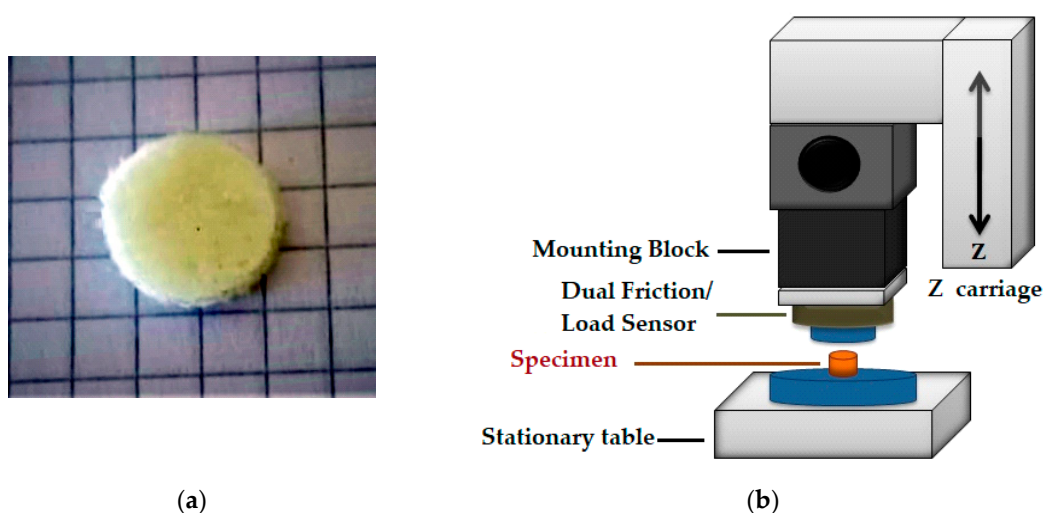

**Figure S1.** Mechanical properties testing: (a) 15 mm diameter sample from CS porous membrane; (b) Schematic representation of the compressive strength testing device.

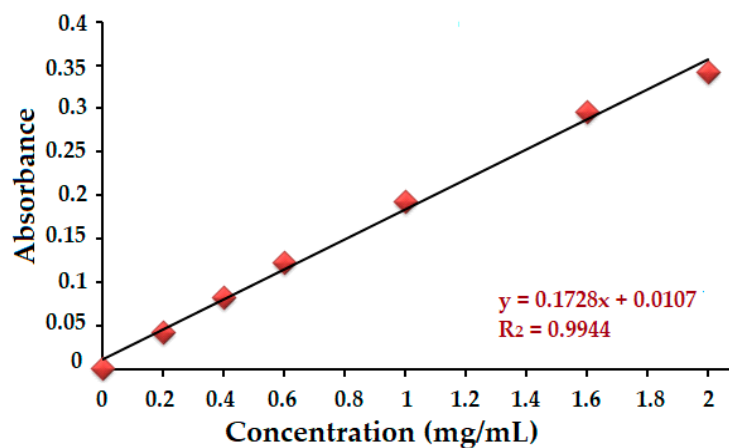

**Figure S2.** Calibration curve of lidocaine, at a wavelength of 264 nm, in the concentration range of 0-2 mg/mL.

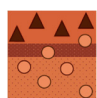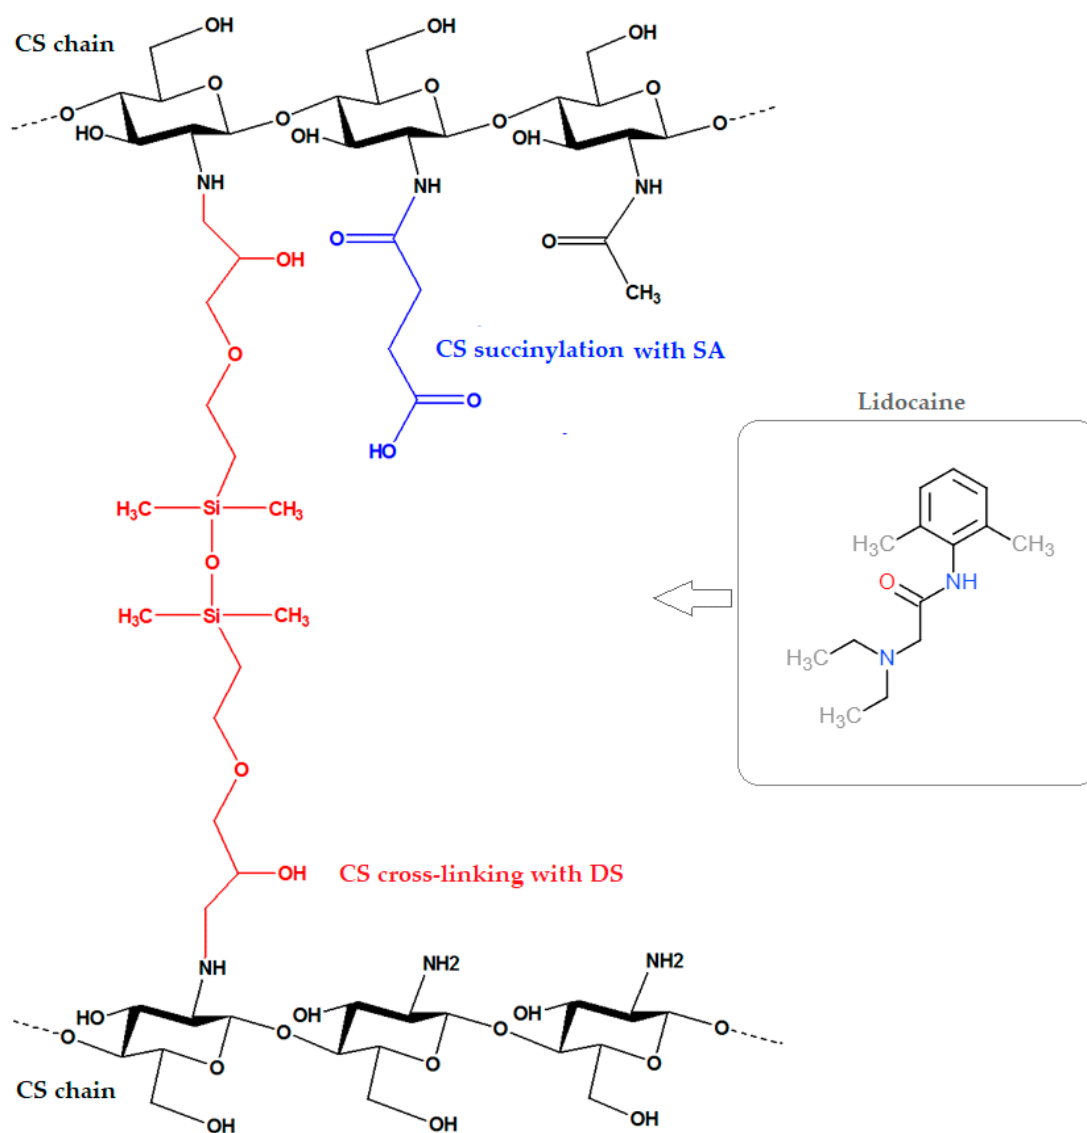

**Figure S3.** Schematic representation of the amphiphilic chitosan system (obtained by functionalization with succinic anhydride (SA) and cross-linking with 1,3-Bis(3-glycidyloxypropyl)tetramethyldisiloxane (DS)) for the embedment of insoluble lidocaine drug.

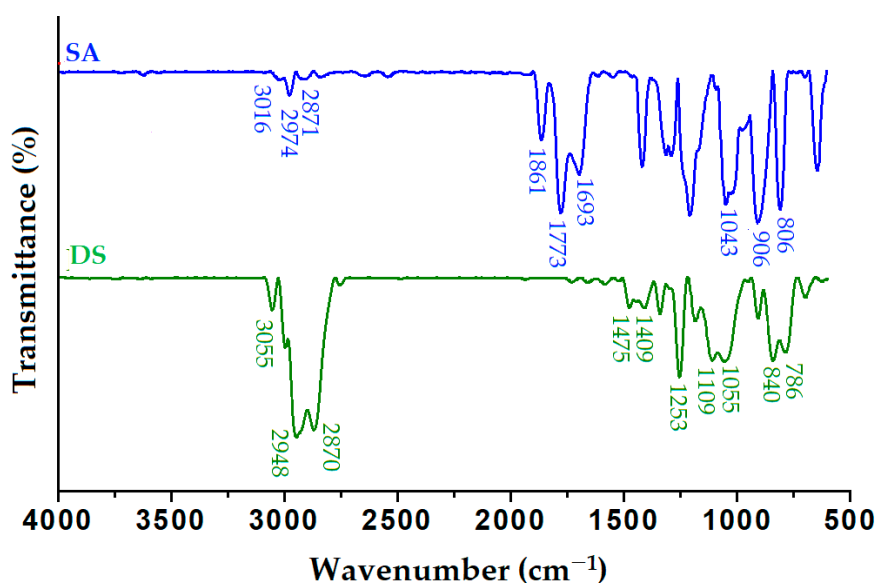

**Figure S4.** FTIR spectra of succinic anhydride (SA) and 1,3-bis-(3-glycidyloxypropyl)-1,1,3,3-tetramethyldisiloxane (DS).

In the characteristic spectrum of succinic anhydride, the main absorption bands are attributed as follows [36]:

- 2978 and 2871  $\text{cm}^{-1}$  - asymmetric and symmetric C–H stretching vibrations;
- 3016  $\text{cm}^{-1}$  - C–H vibrations specific to the AS cycle;
- 1863  $\text{cm}^{-1}$  and 1773  $\text{cm}^{-1}$  - symmetric and asymmetric stretching vibrations of the C=O group of anhydrides;
- 1689  $\text{cm}^{-1}$  - symmetric stretching vibrations of the C=O group (succinic anhydride partially hydrolyzed);
- 1043  $\text{cm}^{-1}$  and 906  $\text{cm}^{-1}$  - C–O–C vibrations for succinic anhydride (five carbon atoms – membered).

The main absorption bands characteristic of DS are [36]:

- 3055  $\text{cm}^{-1}$  - C–H stretching vibrations (epoxy group);
- 2945  $\text{cm}^{-1}$  and 2837  $\text{cm}^{-1}$  - C–H asymmetric and asymmetric stretching vibrations;
- 1254  $\text{cm}^{-1}$  and 840–786  $\text{cm}^{-1}$  - Si–CH<sub>3</sub> stretching vibrations;
- 1053–1109  $\text{cm}^{-1}$  - Si–O–Si stretching vibrations and glycidyloxypropyl C–O–C unit.

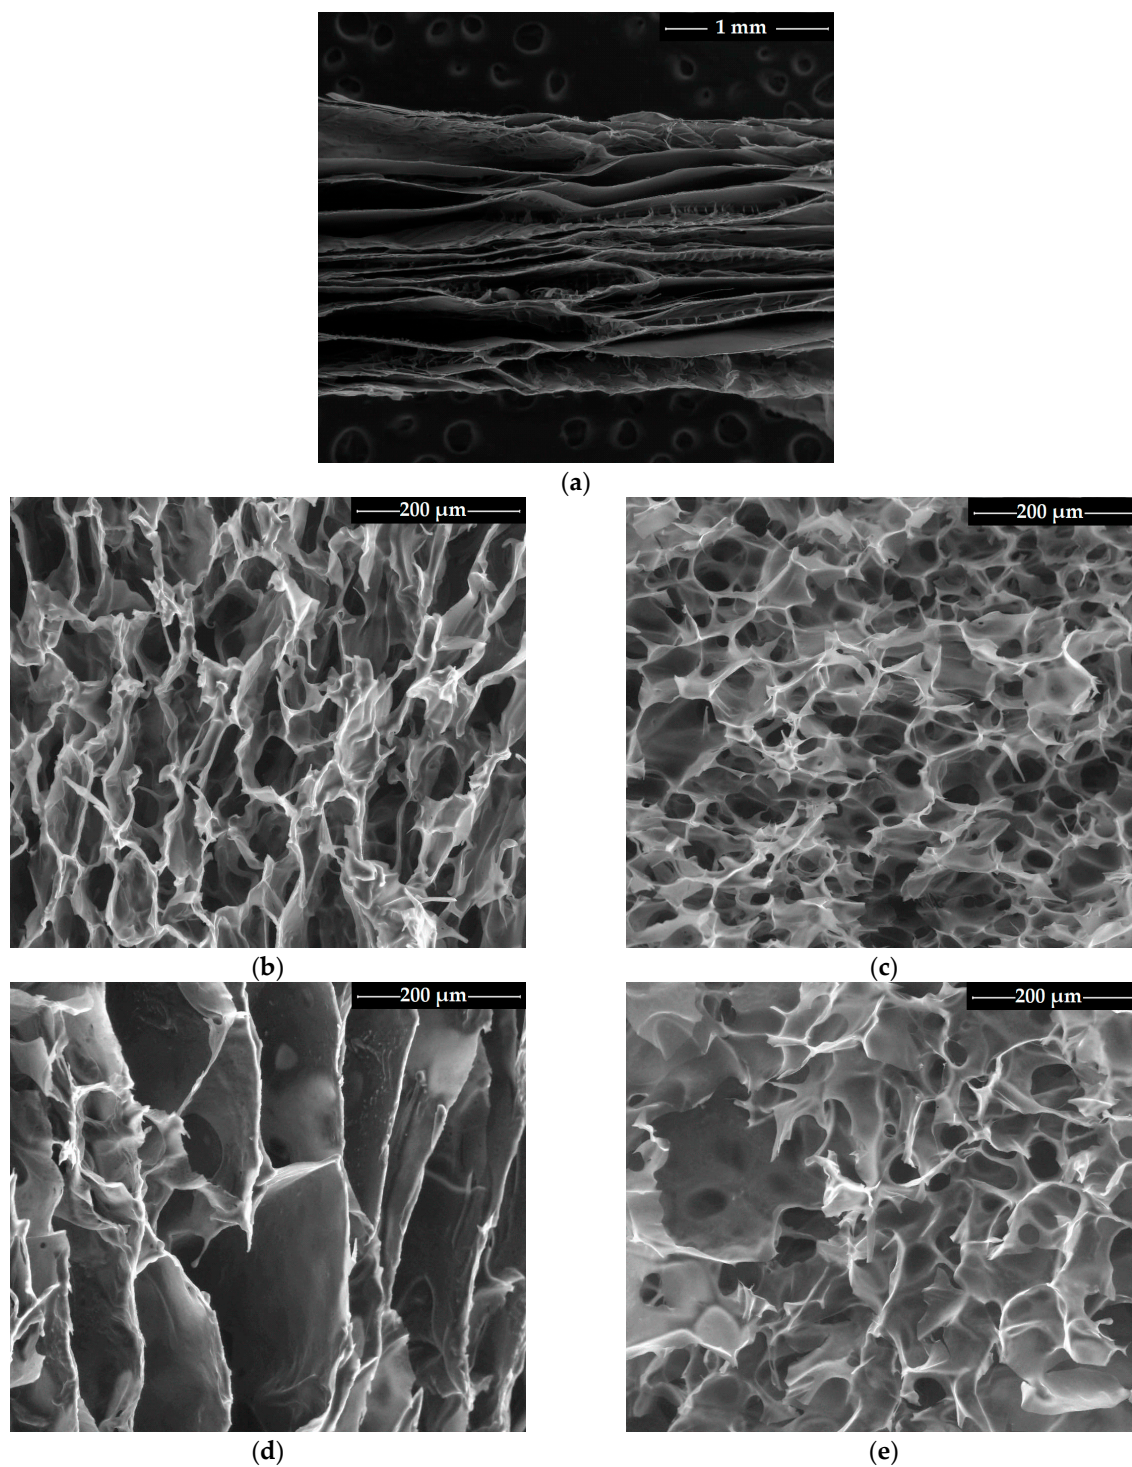

**Figure S5.** SEM images on the cross-section of non-charged chitosan membranes: (a) CS-A, (b) CS-SA/DS-1 and (c) CS-SA/DS-2, and of the lidocaine-charged membranes: (d) CS-SA/DS-1-LID and (e) CS-SA/DS-2-LID.

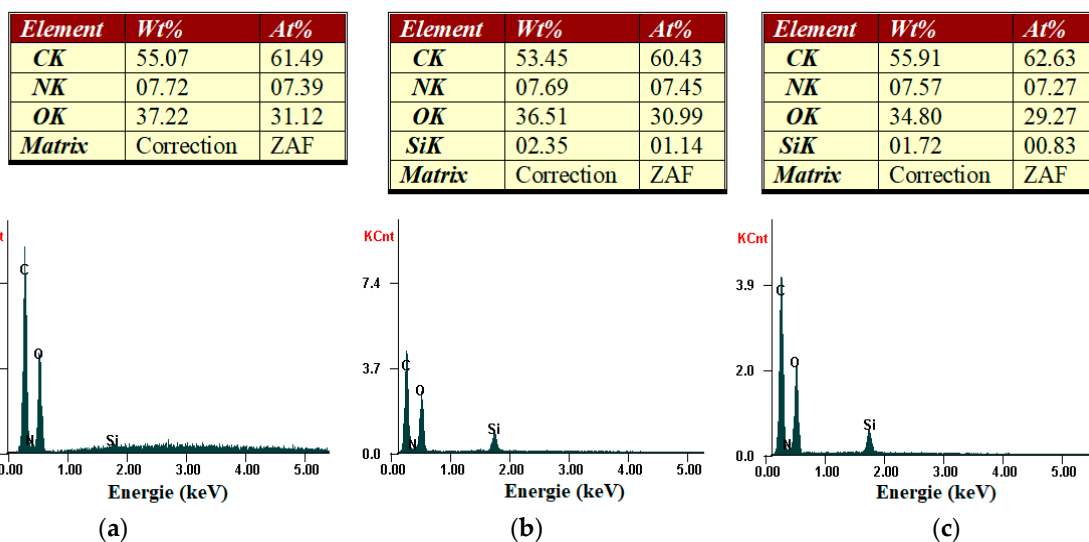

**Figure S6.** Structural elements determined by EDX in the section of: (a) CS-A unmodified membrane; (b) CS-SA/DS-1 modified membrane; and (c) CS-SA/DS-1-LID lidocaine-loaded chitosan membranes. Besides the specific C, O and N atoms of the chitosan and lidocaine compounds, the presence of Si atoms was noticed as the result of the cross-linking process.

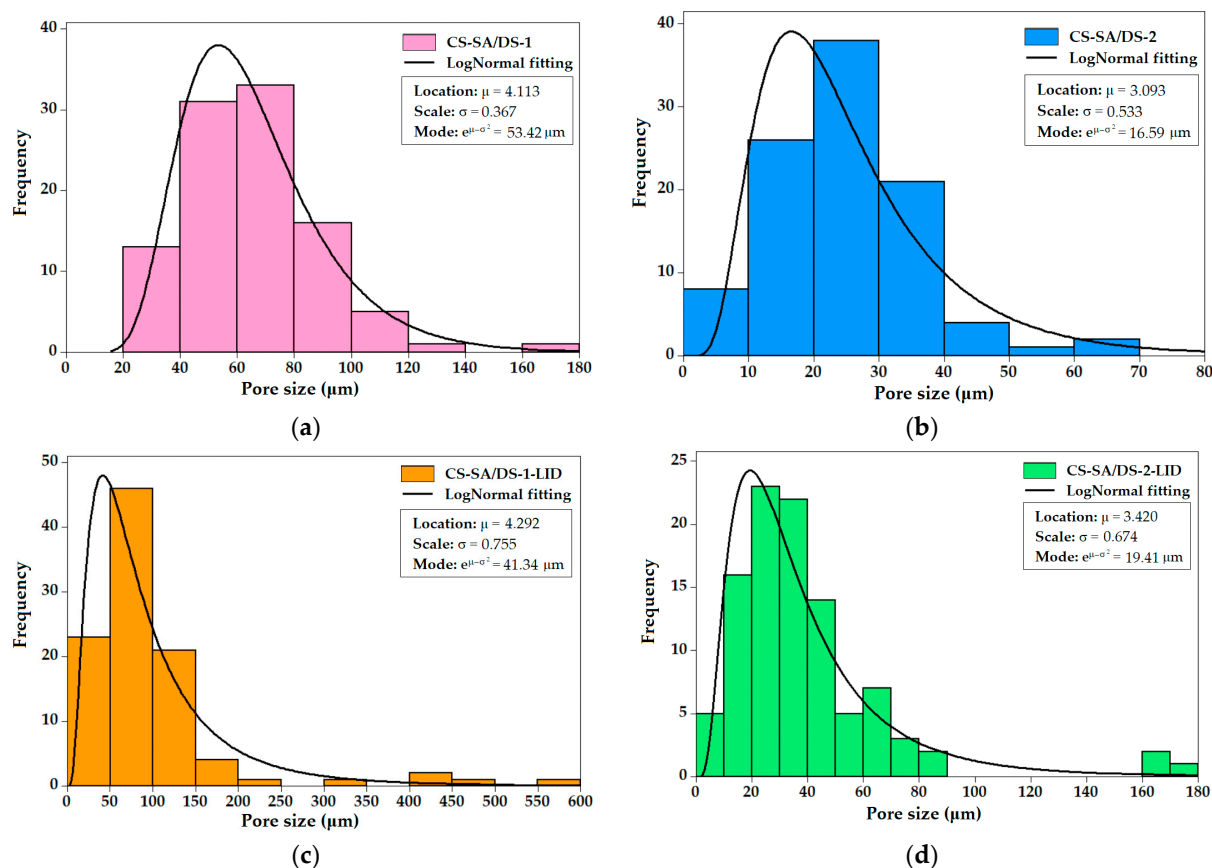

**Figure S7.** Histograms of pore distribution in the cross-section of: non-charged CS membranes (a) CS-SA/DS-1 and (b) CS-SA/DS-2; lidocaine-charged membranes (c) CS-SA/DS-1-LID and (d) CS-SA/DS-2-LID; the experimental data were fitted with LogNormal distribution function using Minitab 16 Software.

**Table S1.** Swelling kinetic models parameters (PSO - pseudo-second order; K-P - Korsmeyer-Peppas) and maximum swelling capacity values (g/g) of the porous membranes, after 5 h of immersion in PBS solution.

| Film code      | PSO                     | K-P model parameters      | Swelling capacity |
|----------------|-------------------------|---------------------------|-------------------|
|                | model parameters        |                           | after 5 h (g/g)   |
| CS-SA/DS-1     | $k_s = 0.60$            | $k_p = 10.59$             | 11.60             |
|                | $Se_1 = 11.35$          | $n = 0.015$               |                   |
|                | $SD = 0.08$             | $SD = 0.13$               |                   |
| CS-SA/DS-2     | $k_s = 1.50$            | $k_p = 26.48$             | 26.63             |
|                | $Se = 26.58$            | $n = 9.32 \cdot 10^{-18}$ |                   |
|                | $SD = 0.41$             | $SD = 0.53$               |                   |
| CS-SA/DS-1-LID | $k_s = 0.35$            | $k_p = 7.85$              | 8.60              |
|                | $Se = 8.63$             | $n = 0.018$               |                   |
|                | $SD = 0.41$             | $SD = 0.53$               |                   |
| CS-SA/DS-2-LID | $k_s = 2.51 \cdot 10^3$ | $k_p = 23.80$             | 22.80             |
|                | $Se = 24.81$            | $n = 4.12 \cdot 10^{-18}$ |                   |
|                | $SD = 0.41$             | $SD = 0.53$               |                   |

<sup>1</sup>  $k_{s1}$  is the constants for the swelling rate,  $Se_1$  represents the theoretical swelling capacity at equilibrium,  $k_p$  is a polymeric network dependent constant and  $n$  is the diffusion exponential coefficient (SD = standard deviation for 10 data points).



**Table S2.** Release kinetic models (PFO - pseudo-first order and K-P - Korsmeyer-Peppas) parameters <sup>1</sup>.  
Lidocaine release efficiency (%) from chitosan porous membranes after 5 h.

| Film code      | PFO              | K-P model parameters | Lidocaine release |
|----------------|------------------|----------------------|-------------------|
|                | model parameters |                      | after 5 h<br>(%)  |
| CS-SA/DS-1-LID | $k_r = 0.15$     | $k_{pr} = 32.14$     | 83.16             |
|                | $S_r = 85.16$    | $n = 0.25$           |                   |
|                | $SD = 1.66$      | $SD = 2.40$          |                   |
| CS-SA/DS-2-LID | $k_r = 0.30$     | $k_{pr} = 48.75$     | 95.24             |
|                | $S_r = 91.73$    | $n = 0.17$           |                   |
|                | $SD = 1.77$      | $SD = 2.41$          |                   |

<sup>1</sup>  $k_r$  - release constants;  $S_r$  - theoretical drug release,  $k_{pr}$  - K-P constant;  $n$  - diffusion coefficient ( $SD$  = standard deviation for 11 data (PFO) and 7 data la (K-P)).
